# Supplementary material for: Smart biocomposite hydrogels in action: unraveling the roles of lignin, temperature, and crosslinker on drug release
Source: Royal Society of Chemistry journal article supplement (doi:10.1039/d5ra05933j), 2025-01-01
Supplement: d5ra05933j1.pdf [file d5ra05933j1.pdf]

Electronic Supporting Information (ESI)

for

**Smart Biocomposite Hydrogels in Action: Unraveling the Roles of Lignin, Temperature, and Crosslinker on Drug Release**

*Missoury Wolff and Eric M. Davis\**

Department of Chemical and Biomolecular Engineering, Clemson University, Clemson, South Carolina 29634

\*To whom correspondence should be addressed; Email: [ericd@clemson.edu](mailto:ericd@clemson.edu)

### **Maximum (Theoretical) Crosslinking Capacities for Each Chemical Compositions**

As crosslinking occurs within each network, a mesh is formed at the junction of the crosslinker and polymer functional groups. To assess the relative capacity of each crosslinker concentration to create the network structure, the percentage of crosslinked functional groups was calculated and presented in **Table S1**. Note that the percentages were calculated with the assumption that each crosslinker can successfully crosslink two functional groups. Therefore, the value presented here represents the maximum fraction of groups crosslinked within each network.

**Table S1.** Percentages of crosslinked groups of interest that correspond to various crosslinker concentrations. Note, negative quantities in millimole per gram constitute groups consumed by crosslinking.

crosslinking.

|          |                          | Percent of Crosslinked [-OH] Groups           |              |              |                 |              |              |
|----------|--------------------------|-----------------------------------------------|--------------|--------------|-----------------|--------------|--------------|
|          |                          | Control Hydrogel                              |              |              | Contains Lignin |              |              |
| Chemical | [-OH] groups             | 5 mass % XL                                   | 10 mass % XL | 15 mass % XL | 5 mass % XL     | 10 mass % XL | 15 mass % XL |
|          | [mmol g <sup>-1</sup> ]  |                                               |              |              |                 |              |              |
| Lignin   | + 6.45                   |                                               |              |              |                 |              |              |
| PVA      | +22.70                   |                                               |              |              |                 |              |              |
| GA Soln  | -19.98                   | 4.43%                                         | 9.35%        | 14.9%        | 2.32%           | 4.89%        | 7.76%        |
|          |                          | Percent of Crosslinked Isopropyl/Amide Groups |              |              |                 |              |              |
| Chemical | Isopropyl & amide groups | 5 mass % XL                                   |              | 10 mass % XL |                 | 15 mass % XL |              |
|          | [mmol g <sup>-1</sup> ]  |                                               |              |              |                 |              |              |
| PNIPAm   | +8.84                    |                                               |              |              |                 |              |              |
| MBA      | -12.97                   |                                               |              |              |                 |              |              |

### **Statistical Analysis**

To improve the rigor of our discussion of the experimental data, unpaired *t* tests were performed on the equilibrium water uptake (EWU) and caffeine diffusivity data to determine if there was a statistical significance in the measured difference in these values between the temperature, lignin incorporation, and crosslinker content. Any *t* test that yielded a two-tailed *p*

value less than or equal to 0.05 (or 5%) was deemed statistically significant. Analysis was performed with GraphPad (graphpad.com). The results of this analysis for the datasets are summarized in **Tables S2** and **S3**.

**Table S2.** Summary of statistical significance of equilibrium water uptake (EWU) values of the membranes investigated in this study. Here, the values tabulated are the two-tailed p values, where ✓'s indicate statistical significance between samples and ×'s indicate a lack of statistical significance.

| EWU             | BCL at RT      | BCL at 40 °C    | BCL at RT       | CON at RT       |
|-----------------|----------------|-----------------|-----------------|-----------------|
|                 | to CON at RT   | to CON at 40 °C | to BCL at 40 °C | to CON at 40 °C |
| <b>5XL</b>      | <0.0001<br>✓   | 0.0058<br>✓     | 0.3242<br>×     | 0.0177<br>✓     |
| <b>10XL</b>     | <0.0001<br>✓   | <0.0001<br>✓    | 0.3652<br>×     | <0.0001<br>✓    |
| <b>15XL</b>     | 0.0005<br>✓    | 0.0033<br>✓     | 0.5790<br>×     | 0.5608<br>×     |
| <b>RT</b>       | <b>BCL-5XL</b> |                 | <b>BCL-15XL</b> |                 |
| <b>BCL-5XL</b>  | —              |                 | 0.4309<br>×     |                 |
| <b>BCL-10XL</b> | 0.9849<br>×    |                 | 0.3955<br>×     |                 |
| <b>40 °C</b>    | <b>BCL-5XL</b> |                 | <b>BCL-15XL</b> |                 |
| <b>BCL-5XL</b>  | —              |                 | 0.0956<br>×     |                 |
| <b>BCL-10XL</b> | 0.7743<br>×    |                 | 0.0536<br>×     |                 |

**Table S3.** Summary of statistical significance of caffeine diffusivity values of the membranes investigated in this study. Here, the values tabulated are the two-tailed p values, where ✓'s indicate statistical significance between samples and ×'s indicate a lack of statistical significance.

| Diffusivity     | BCL at RT      | BCL at 40 °C    | BCL at RT       | CON at RT       |
|-----------------|----------------|-----------------|-----------------|-----------------|
|                 | to CON at RT   | to CON at 40 °C | to BCL at 40 °C | to CON at 40 °C |
| <b>5XL</b>      | 0.0505<br>×    | 0.0150<br>✓     | 0.2004<br>×     | 0.7078<br>×     |
| <b>10XL</b>     | 0.0004<br>✓    | 0.0107<br>✓     | 0.0407<br>✓     | 0.3734<br>✓     |
| <b>15XL</b>     | 0.0003<br>✓    | 0.0022<br>✓     | 0.0815<br>×     | 0.0470<br>✓     |
| <b>RT</b>       | <b>BCL-5XL</b> |                 | <b>BCL-15XL</b> |                 |
| <b>BCL-5XL</b>  | —              |                 | 0.7756<br>×     |                 |
| <b>BCL-10XL</b> | 0.2703<br>×    |                 | 0.1239<br>×     |                 |
| <b>40 °C</b>    | <b>BCL-5XL</b> |                 | <b>BCL-15XL</b> |                 |
| <b>BCL-5XL</b>  | —              |                 | 0.1029<br>×     |                 |
| <b>BCL-10XL</b> | 0.2261<br>×    |                 | 0.0827<br>×     |                 |
